# Supplementary material for: Controlling the Regional Identity of hPSC-Derived Neurons to Uncover Neuronal Subtype Specificity of Neurological Disease Phenotypes
Source: PubMed Central journal article supplement — Stem Cell Reports. 2015 Nov 5;5(6):1010–22. doi: 10.1016/j.stemcr.2015.10.005 (PMC4682123; doi:10.1016/j.stemcr.2015.10.005), 2015-11-05
Supplement: mmc1.pdf [file mmc1.pdf]

**Stem Cell Reports, Volume 5**

**Supplemental Information**

**Controlling the Regional Identity of hPSC-Derived Neurons  
to Uncover Neuronal Subtype Specificity of Neurological  
Disease Phenotypes**

**Kent Imaizumi, Takefumi Sone, Keiji Ibata, Koki Fujimori, Michisuke Yuzaki, Wado  
Akamatsu, and Hideyuki Okano**

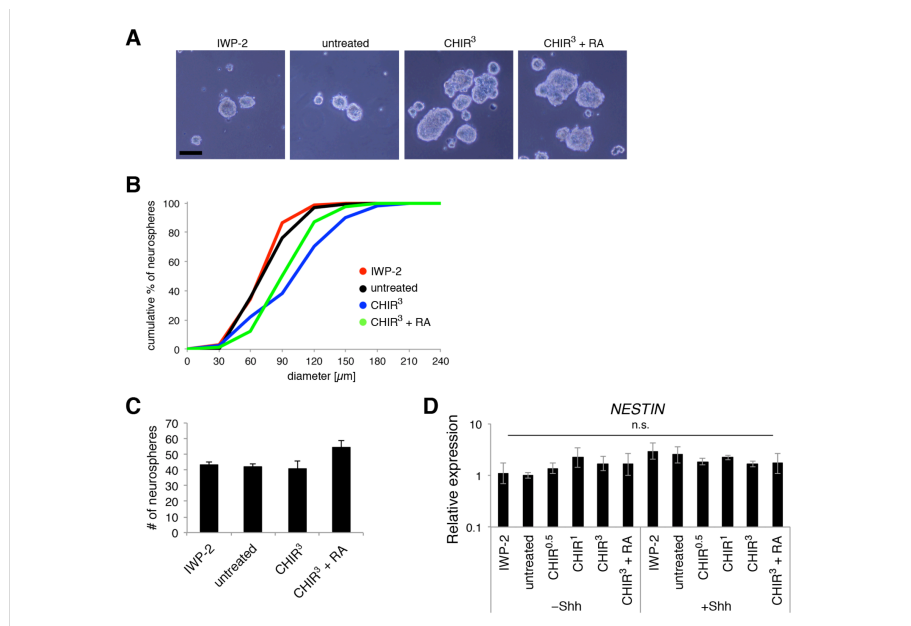

**Figure S1. Patterning factors promoted expansion of neurospheres, but had no effect on neural induction**

(A) Representative images of neurospheres (scale bar = 100  $\mu\text{m}$ ).

(B) Quantification of the size distribution of IWP-2, CHIR, and RA-treated neurospheres. While IWP-2 had no effect, the treatment of CHIR and RA promoted expansion of neurospheres.

(C) Quantification of the number of neurospheres (n = 3 technical replicates).

(D) qRT-PCR analysis of neurospheres for *NESTIN* expression (n = 3 independent experiments; mean  $\pm$  SEM; n.s., not significant; ANOVA). Uniform expression of *NESTIN* confirmed that neural induction was unaffected by patterning factors.

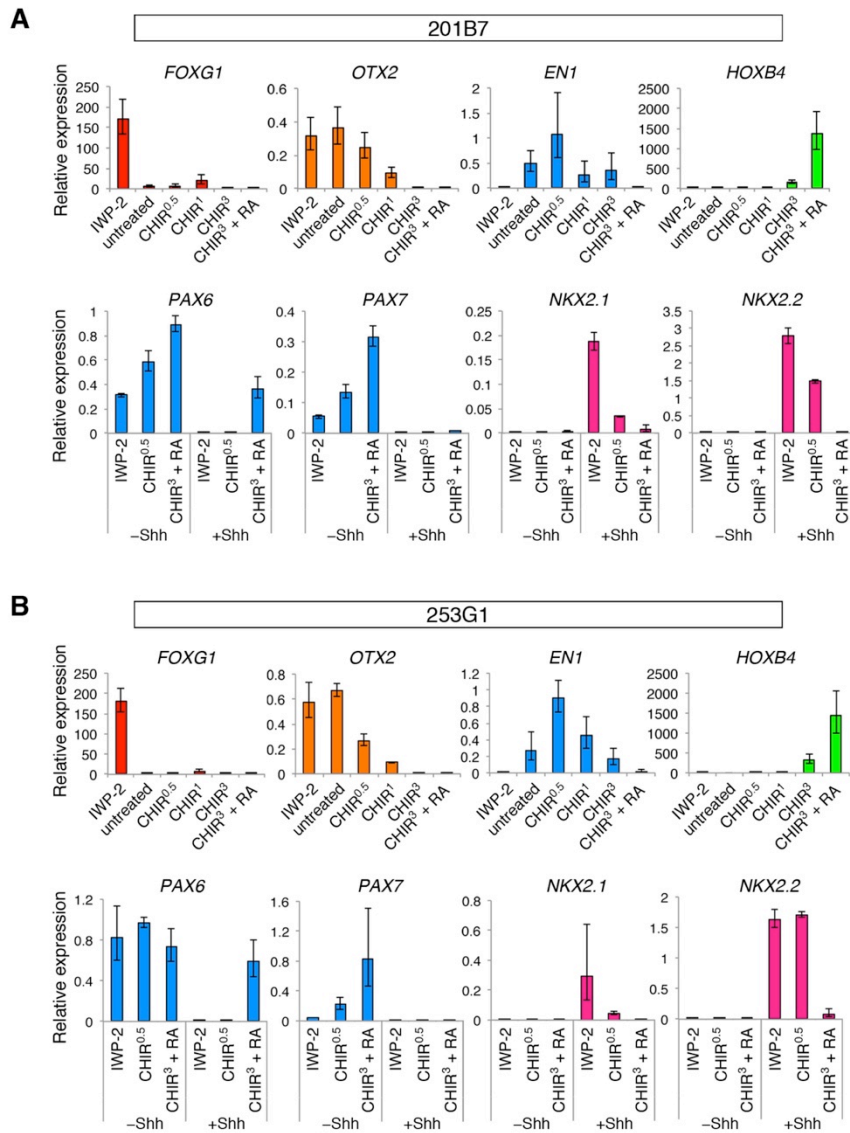

**Figure S2. Region control was reproduced in iPSCs**

(A) qRT-PCR analysis of 201B7-derived neurospheres for A-P and D-V markers expression relative to the untreated condition of KhES-1 (n = 3–4 independent experiments; mean  $\pm$  SEM).

(B) qRT-PCR analysis of 253G1-derived neurospheres for A-P and D-V markers expression relative to the untreated condition of KhES-1 (n = 3 independent experiments; mean  $\pm$  SEM).

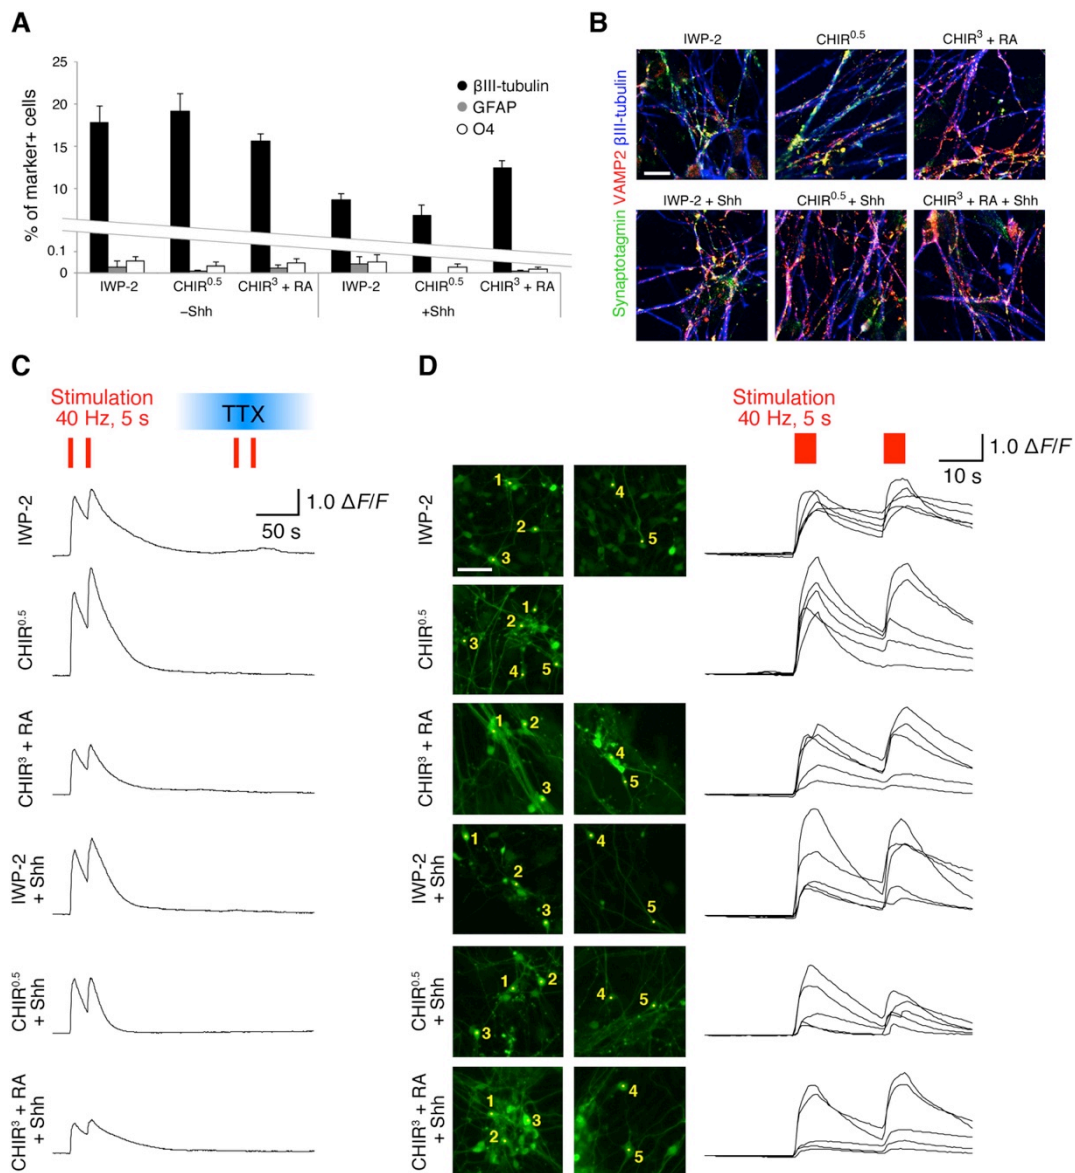

**Figure S3. Differentiation capacity and neuronal functionality**

(A) Quantification of the number of neurosphere-derived neurons, astrocytes, and oligodendrocytes ( $n = 3$  independent experiments; mean  $\pm$  SEM.). Neurospheres preferentially differentiated into neurons rather than astrocytes or oligodendrocytes.

(B) Immunocytochemical analysis of ESC-derived neurons for synapse markers (scale bar = 10  $\mu$ m). The expression of synaptotagmin and VAMP2 was identified in each

condition.

(C) Traces of intracellular calcium signals. Calcium surges were induced by field stimulation and blocked by TTX.

(D) Traces of intracellular calcium signals in five cells. Cells 1–5 correspond to individual cells analyzed by calcium imaging (scale bar = 50  $\mu\text{m}$ ).

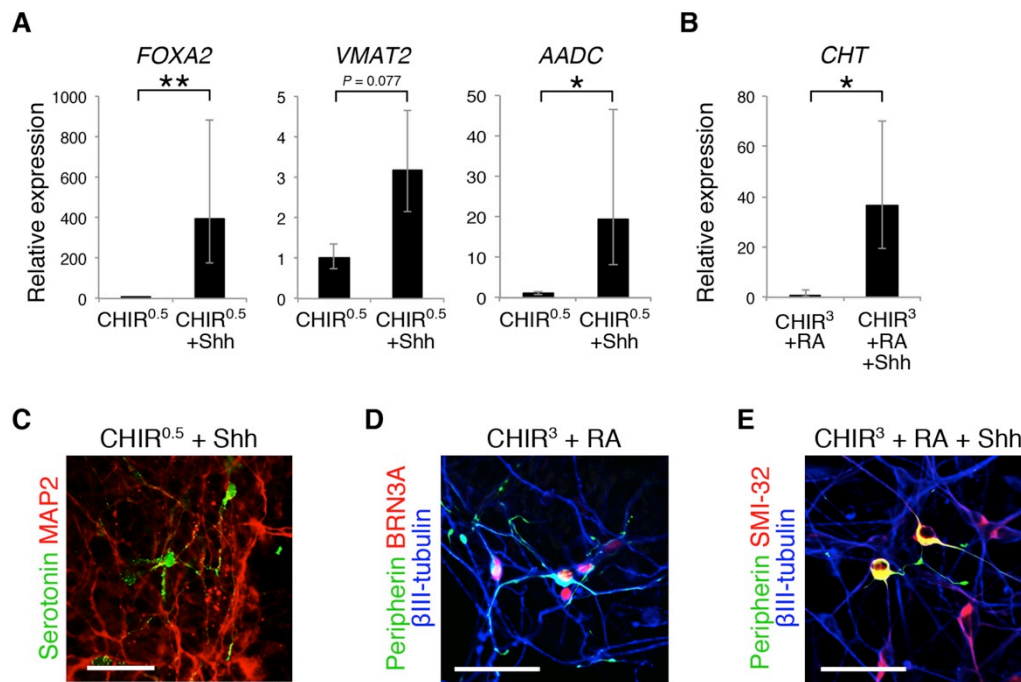

**Figure S4. Further characterization of ESC-derived neurons**

(A–B) qRT-PCR analysis of neurosphere-derived neurons for the expression of neuronal subtype markers (n = 3 independent experiments; mean ± SEM; \*P < 0.05, \*\*P < 0.01; Student’s t test).

(C–E) Immunocytochemical analysis of neurosphere-derived neurons for neuronal subtype markers (scale bar = 50 μm).

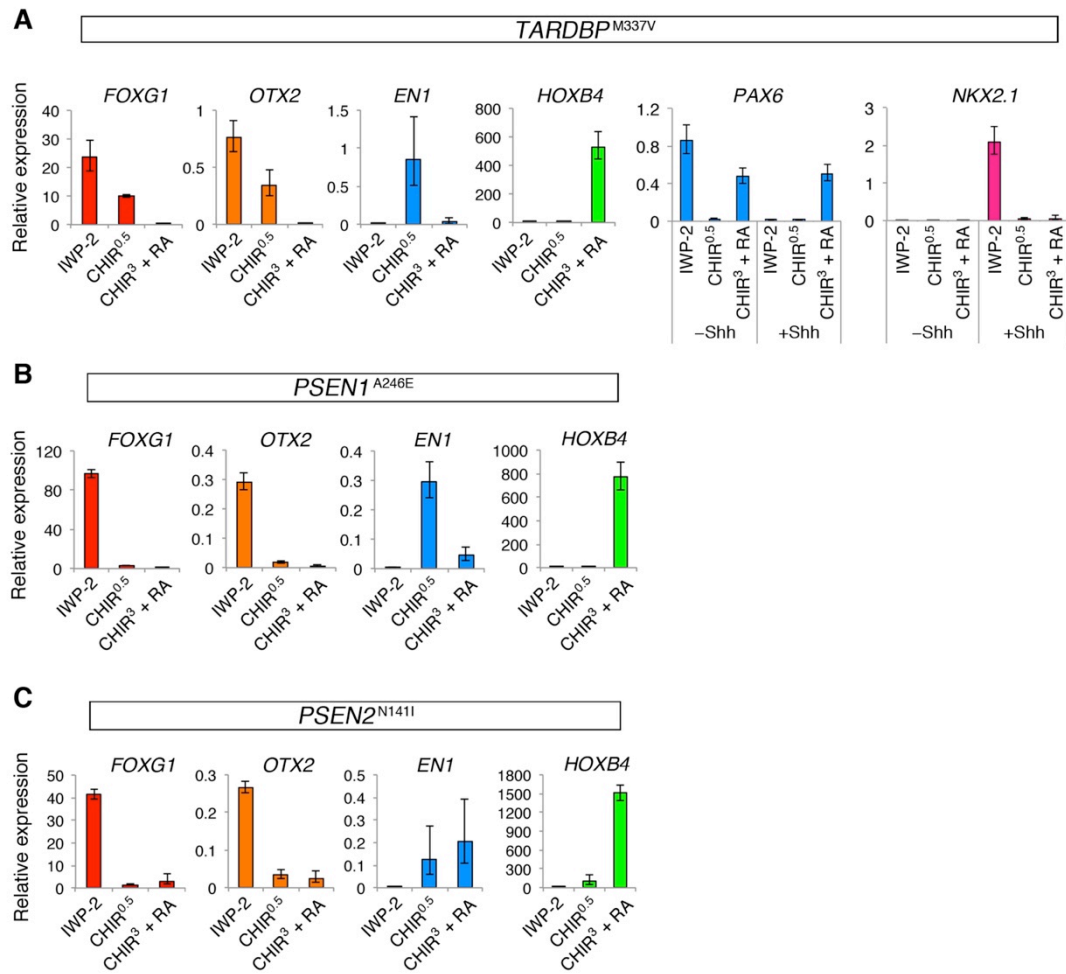

**Figure S5. Control of regional identities of disease-specific iPSC-derived neural progenitors**

(A) qRT-PCR analysis of *TARDBP*<sup>M337V</sup> iPSC-derived neurospheres for regional markers expression relative to the untreated condition of KhES-1 (n = 3 independent experiments; mean ± SEM).

(B) qRT-PCR analysis of *PSEN1*<sup>A246E</sup> iPSC-derived neurospheres for regional markers expression relative to the untreated condition of KhES-1 (n = 3 independent experiments; mean ± SEM).

(C) qRT-PCR analysis of *PSEN2*<sup>N141I</sup> iPSC-derived neurospheres for regional markers expression relative to the untreated condition of KhES-1 (n = 3 independent experiments; mean  $\pm$  SEM).



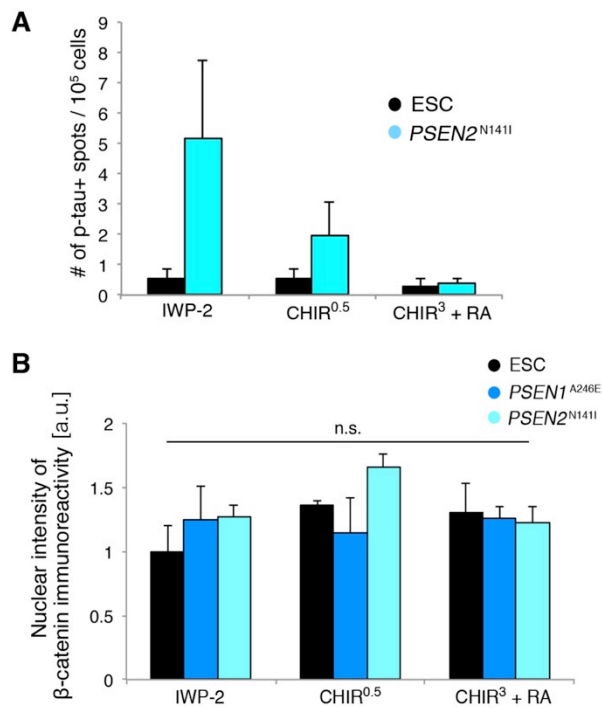

**Figure S6. Region-specific phenotypes in the AD iPSC cultures**

(A) Quantification of p-tau+ spots (n = 3 independent experiments; mean ± SEM). The data obtained from ESC cultures are same as shown in Fig.5.

(B) Quantification of nuclear intensity of β-catenin immunoreactivity (n = 3 independent experiments; mean ± SEM; n.s., not significant; ANOVA). See also Supplemental Experimental Procedures.

**Table S1. Summary of immunocytochemical quantification**

|                              | Neurosphere <sup>a</sup> |        |        |         |         |        | Neuron <sup>b</sup> |        |
|------------------------------|--------------------------|--------|--------|---------|---------|--------|---------------------|--------|
|                              | FOXP1                    | OTX1   | HOXB4  | PAX6    | NKX2.1  | NKX2.2 | TBR1                | HB9    |
| IWP-2                        | 41 ± 1                   | 8 ± 2  | 0 ± 0  | 81 ± 8  | 0 ± 0   |        | 23 ± 10             |        |
| IWP-2 + Shh                  |                          |        |        | 1 ± 0   | 40 ± 19 |        | 0 ± 0               |        |
| untreated                    | 11 ± 2                   | 61 ± 1 | 0 ± 0  |         |         |        |                     |        |
| CHIR <sup>3</sup>            | 0 ± 0                    | 0 ± 0  | 14 ± 4 |         |         |        |                     |        |
| CHIR <sup>3</sup> + RA       | 0 ± 0                    | 0 ± 0  | 63 ± 7 | 62 ± 21 |         | 1 ± 1  |                     | 0 ± 0  |
| CHIR <sup>3</sup> + RA + Shh |                          |        |        | 85 ± 4  |         | 20 ± 4 |                     | 44 ± 3 |

<sup>a</sup>The frequency of neurospheres containing immunopositive cells is shown as the percentage of total neurospheres (n = 3 independent experiments; mean ± SEM).

<sup>b</sup>The frequency of immunopositive cells is shown as the percentage of MAP2+ neurons (n = 3 independent experiments; mean ± SEM).

**Table S2. List of qRT-PCR primers**

| Gene          | Forward                       | Reverse                       |
|---------------|-------------------------------|-------------------------------|
| <i>AADC</i>   | AGGAAGCCCTGGAGAGAGAC          | ATTGTCAAAGGAGCAGCATGT         |
| <i>ACTB</i>   | TGAAGTGTGACGTGGACATC          | GGAGGAGCAATGATCTTGAT          |
| <i>ASCL1</i>  | GATGAGTAAGGTGGAGACACTGCG      | CCGACGAGTAGGATGAGACCG         |
| <i>CHT</i>    | ATCCCAGCCATACTCATT            | CAGAAACTGCACCAAGACCA          |
| <i>DLX2</i>   | ACGCTCCCTATGGAACCAAGTT        | TCCGAATTTTCAGGCTCAAGGT        |
| <i>EMX1</i>   | AGGTGAAGGTGTGGTTCCAG          | AGTCATTGGAGGTGACATCG          |
| <i>EMX2</i>   | GCTTCTAAGGCTGGAACACG          | CCAGCTTCTGCCTTTTGAAC          |
| <i>EN1</i>    | CCGCGCACCAGGAAGCTGAA          | CAGCGCCAGGCCGTTCTTGA          |
| <i>FOXA2</i>  | CCGTTCTCCATCAACAACCT          | GGGGTAGTGCATCACCTGTT          |
| <i>FOXG1</i>  | CCCGTCAATGACTTCGCAGA          | GTCCCGTCGTAAAACCTTGGC         |
| <i>GATA3</i>  | CAGACCACCACAACCACACTCT        | GGATGCCTTCCTTCTTCATAGTCA      |
| <i>HB9</i>    | GTCCACCGCGGGCATGATCC          | TCTTCACCTGGGTCTCGGTGAGC       |
| <i>HOXB4</i>  | ACGTGAGCACGGTAAACCCCAA        | ATTCTTCTCCAGCTCCAAGACCT       |
| <i>HOXC4</i>  | TTCACGTTAGCACGGTGAAC          | GACTTTGGTGTGGGGAGTC           |
| <i>LBX1</i>   | CGCCAGCAAGACGTTTAAG           | CTGCCCAAAGATGGTCATAC          |
| <i>LHX6</i>   | GCAGAACAGCTGCTACATCAAGAA      | CAGTCGCTGGCGTAGATCTGTGTC      |
| <i>LHX8</i>   | GTGTCATACAGGTGTGGTTTC         | GGGTACGTAGGCAGAATAAG          |
| <i>LHX9</i>   | GATGCCAAGGACCTCAAGC           | CTCGTGCCTTTTGAAC              |
| <i>LMX1A</i>  | GATCCCTTCGACAGGGTCTC          | GGTTTCCCACTCTGGACTGC          |
| <i>NESTIN</i> | TTCCCTCAGCTTTCAGGACCCCAA      | AAGGCTGGCACAGGTGTCTCAA        |
| <i>NGN2</i>   | CCTGGAAACCATCTCACTTCA         | TACCCAAAGCCAAGAAATGC          |
| <i>NKX2.1</i> | AGGGCGGGGCACAGATTGGA          | GCTGGCAGAGTGTGCCCAGA          |
| <i>NKX2.2</i> | AAACCATGTCACGCGCTCA           | GGCGTTGTACTGCATGTGCT          |
| <i>OTX1</i>   | CACTAACTGGCGTGTTCCTGC         | GGCGTGGAGCAAATCG              |
| <i>OTX2</i>   | ACAAGTGGCCAATTCCTCC           | GAGGTGGACAAGGATCTGA           |
| <i>PAX6</i>   | ACCACACCGGTTTCCTCCTTCACA      | TTGCCATGGTGAAGCTGGGCAT        |
| <i>PAX7</i>   | CTTCAGTGGGAGGTCAGGTT          | CAAACACAGCATCGACGG            |
| <i>PET1</i>   | CGGCGGCGATGAGACAGAGCGGCGCCTCC | ACGCGATGCAGCCGGCGTTCGCGCGGTCA |
| <i>SIX3</i>   | ACCGGCCTCACTCCACACA           | CGCTCGGTCCAATGGCCTGG          |
| <i>TBR1</i>   | ATGGGCAGATGGTGGTTTTTA         | GACGGCGATGAACTGAGTCT          |
| <i>TH</i>     | TCATCACCTGGTCACCAAGTT         | GGTCGCCGTGCCTGTACT            |
| <i>VMAT2</i>  | CGGATGTGGCATTGTATGG           | TTCTTCTTTGGCAGGTGGACTTC       |

**Table S3. List of Antibodies and Dilutions**

| Protein             | Species | Source (cat. #)                       | Dilution |
|---------------------|---------|---------------------------------------|----------|
| $\beta$ III-tubulin | Mouse   | Sigma (T8660)                         | 1:500    |
| $\beta$ -catenin    | Mouse   | BD Transduction Laboratories (610154) | 1:200    |
| BRN3A               | Mouse   | Chemicon (MAB1585)                    | 1:500    |
| FOXG1               | Rabbit  | Abcam (ab18259)                       | 1:500    |
| GFAP                | Rat     | Invitrogen (13-0300)                  | 1:500    |
| HB9                 | Mouse   | DSHB (81.5C10)                        | 1:250    |
| HOXB4               | Rat     | DSHB (I12)                            | 1:100    |
| MAP2                | Mouse   | Sigma (M4403)                         | 1:500    |
| MAP2                | Rabbit  | Chemicon (AB5622)                     | 1:1000   |
| NKX2.1              | Mouse   | Invitrogen (18-0221)                  | 1:50     |
| NKX2.2              | Mouse   | DSHB (74.5A5)                         | 1:100    |
| O4                  | Mouse   | Chemicon (MAB345)                     | 1:4000   |
| OTX1                | Mouse   | DSHB (5F5)                            | 1:5000   |
| p-tau               | Mouse   | Innogenetics (90206)                  | 1:500    |
| PAX6                | Rabbit  | MBL (PD022)                           | 1:200    |
| Peripherin          | Rabbit  | Chemicon (AB1530)                     | 1:1000   |
| Serotonin           | Goat    | Immunostar (20079)                    | 1:500    |
| SMI-32              | Mouse   | Covance (SMI-32P)                     | 1:2500   |
| Synaptotagmin       | Mouse   | gift from Dr. Makoto Itakura          | 1:250    |
| TBR1                | Rabbit  | Abcam (ab31940)                       | 1:200    |
| VAMP2               | Rabbit  | gift from Dr. Makoto Itakura          | 1:250    |

## **Supplemental Experimental Procedures**

### **Neurosphere formation assay**

Neurosphere size was assessed by measuring neurosphere diameters on differentiation day 7 by using the IN Cell Analyzer 1000 System (GE Healthcare Biosciences). Only neurospheres larger than 20  $\mu\text{m}$  in diameter were analyzed.

### **Calcium imaging**

Calcium imaging analyses were performed as described previously (Shimada et al., 2012; Zhou et al., 2014). For calcium dye loading, cells attached on glass coverslips were incubated at 37°C for 20 min with 4  $\mu\text{M}$  Fluo-4 AM (Thermo Fisher Scientific) in imaging solution (117 mM NaCl, 2.5 mM KCl, 2 mM CaCl<sub>2</sub>, 2 mM MgSO<sub>4</sub>, 25 mM HEPES and 30 mM D-(+)-glucose), followed by washing for 30 minutes in imaging solution. Coverslips were then transferred into a custom-made field stimulation chamber and continuously perfused at 2 ml/min with imaging solution. Time-lapse image sequences (20 $\times$  magnification) were acquired at 2 Hz using a Nikon Eclipse microscope (Nikon) equipped with a cooled CCD camera (iXon, Andor Technology). Extracellular field stimulation was performed with two parallel platinum wires at 25 V/cm. Each stimulation was a train of 500 microsecond pulses at 40 Hz for 5 seconds. The fluorescence change over time is defined as  $\Delta F/F = (F - F_0)/F_0$ , where  $F$  = the fluorescence at a given time point and  $F_0$  = the fluorescence at time zero of each cell. To assess changes in calcium signaling in response to perturbation of neuronal activity, 0.2  $\mu\text{M}$  the voltage-gated sodium channel blocker tetrodotoxin (TTX; Alomone Labs) was applied by bath application.

### **Quantification of nuclear $\beta$ -catenin intensity**

To assess GSK3 $\beta$  activity, the nuclear intensity of  $\beta$ -catenin immunoreactivity was quantified through automated image acquisition and analysis by using an IN Cell Analyzer 6000 System (GE Healthcare Biosciences) based on a protocol modified from Kirkeby and colleagues (Kirkeby et al., 2012).

## Supplemental References

Kirkeby, A., Grealish, S., Wolf, D. a, Nelander, J., Wood, J., Lundblad, M., Lindvall, O., and Parmar, M. (2012). Generation of regionally specified neural progenitors and functional neurons from human embryonic stem cells under defined conditions. *Cell Rep. 1*, 703–714.

Shimada, H., Okada, Y., Ibata, K., Ebise, H., Ota, S.I., Tomioka, I., Nomura, T., Maeda, T., Kohda, K., Yuzaki, M., et al. (2012). Efficient Derivation of Multipotent Neural Stem/Progenitor Cells from Non-Human Primate Embryonic Stem Cells. *PLoS One 7*.

Zhou, Z., Kohda, K., Ibata, K., Kohyama, J., Akamatsu, W., Yuzaki, M., Okano, H.J., Sasaki, E., and Okano, H. (2014). Reprogramming non-human primate somatic cells into functional neuronal cells by defined factors. *Mol. Brain 7*, 24.
